# Supplementary material
Source: MDPI journal article supplement (https://www.mdpi.com/2075-163X/13/8/1039)
Supplement: s1 [file s1]

Archive with 2 entries (2 files):
- minerals-2533426 - SM tables 1-8.xlsx
- minerals-2533426-supplementary-proofreading.pdf
