# Supplementary material
Source: MDPI journal article supplement (https://www.mdpi.com/2075-163X/13/8/1039)
Supplement: s1 [file s1 › minerals-2533426 - SM tables 1-8.xlsx]

## Sheet: Table 1
Table 1. Representative electron microprobe analyses of K-feldspar in Mount El-Sibai granitic varities (Cations were calculated based on 32 oxygen).
Rock type		Alkali-feldspar granites																			Alkali-amphibole bearing granites
Sample No.		1	2	3	4	5	6	7	8	9	10	11	12	13	14	15	16	17	18		19	20	21	22	23	24	25	26	27	28	29
SiO2		64.913	64.827	64.703	64.291	64.79	64.52	64.924	64.505	64.604	64.727	64.631	64.217	64.275	64.298	64.465	64.206	64.15	64.579		64.362	64.012	64.606	64.401	64.16	64.602	64.431	64.607	64.767	64.317	64.282
TiO2		0.022	0.017	0.012	0.015	0.009	0.005	0.015	0.014	0.009	0.006	0.003	0.017	0.005	0.012	0.011	0.002	0.01	0.002		0.006	0.005	0.001	0.001	0.015	0.006	0.009	0.003	0.007	0.015	0.005
Al2O3		17.984	18.274	18.581	18.288	18.365	18.522	17.964	18.526	18.08	18.347	18.084	18.167	18.432	18.512	18.368	18.307	18.338	18.428		18.427	18.665	18.439	18.538	18.639	18.472	18.573	18.377	18.497	18.704	18.712
FeO		0.523	0.267	0.064	0.382	0.186	0.146	0.541	0.087	0.662	0.176	0.456	0.591	0.255	0.075	0.244	0.205	0.151	0.367		0.094	0.361	0.212	0.137	0.305	0.155	0.072	0.287	0.103	0.142	0.141
MgO		0.009	0.014	0.007	0.005	0.001	0.001	0.001	0.001	0.002	0.003	0.015	0.006	0.003	0.004	0.007	0.005	0.01	0.007		0.009	0.016	0.001	0.006	0.013	0.001	0.001	0.003	0.001	0.019	0.007
CaO		0.012	0.023	0.027	0.022	0.011	0.016	0.019	0.022	0.021	0.031	0.032	0.017	0.033	0.017	0.017	0.024	0.033	0.021		0.011	0.026	0.021	0.025	0.034	0.025	0.035	0.028	0.021	0.015	0.022
Na2O		0.327	0.211	0.301	0.249	0.219	0.223	0.153	0.333	0.198	0.24	0.201	0.172	0.197	0.203	0.377	0.3	0.178	0.221		0.245	0.208	0.32	0.331	0.301	0.295	0.266	0.322	0.3	0.289	0.278
K2O		16.208	16.394	16.379	16.392	16.447	16.492	16.405	16.339	16.459	16.411	16.476	16.555	16.374	16.402	16.243	16.443	16.642	16.518		16.407	16.555	16.444	16.544	16.471	16.497	16.518	16.224	16.318	16.39	16.462
BaO		0.009	0.012	0.006	0.008	0.003	0.026	0.019	0.053	0.01	0.004	0.002	0.014	0.001	0.002	0.002	0.003	0.016	0.005		0.001	0.013	0.01	0.012	0.004	0.014	0.02	0.008	0.003	0.003	0.025
Total		100.007	100.039	100.08	99.652	100.031	99.951	100.041	99.88	100.045	99.945	99.9	99.756	99.575	99.525	99.734	99.495	99.528	100.148		99.562	99.861	100.054	99.995	99.942	100.067	99.925	99.859	100.017	99.894	99.934
Si		12.0229	11.9968	11.961	11.9623	11.9891	11.9568	12.0286	11.9563	11.9877	11.9877	11.9981	11.9594	11.9562	11.9566	11.9674	11.9619	11.9556	11.9571		11.9664	11.8991	11.9632	11.9398	11.909	11.9607	11.9449	11.9752	11.9764	11.9231	11.9192
Ti		0.00306473	0.0023662	0.00166846	0.00209917	0.0012526	0.000696918	0.00209022	0.00195174	0.00125606	0.000835786	0.000418876	0.00238123	0.000699539	0.00167835	0.00153589	0.000280251	0.00140174	0.000278521		0.000839032	0.000699063	0.000139273	0.000139443	0.00209408	0.000835515	0.00125494	0.000418232	0.00097356	0.00209144	0.000697302
Al		3.92549	3.98543	4.04801	4.01015	4.00498	4.04518	3.92231	4.04682	3.9537	4.00449	3.95637	3.98725	4.04066	4.05688	4.01853	4.01951	4.02771	4.02109		4.03757	4.08895	4.02386	4.0504	4.07721	4.03046	4.0579	4.01429	4.03092	4.08627	4.08893
Fe(ii)		0.0809994	0.0413167	0.00989295	0.0594335	0.0287803	0.0226243	0.0838126	0.0134842	0.102715	0.0272564	0.0707848	0.0920344	0.0396637	0.011662	0.0378764	0.0319361	0.0235318	0.0568204		0.0146139	0.0561131	0.0328257	0.0212388	0.0473384	0.0239964	0.0111616	0.0444825	0.0159262	0.0220117	0.0218616
Mg		0.0024851	0.00386246	0.00192915	0.00138695	0.000275869	0.000276277	0.000276206	0.000276329	0.00055326	0.00082832	0.00415134	0.00166585	0.000831948	0.0011089	0.00193731	0.00138874	0.00277844	0.00193223		0.00249461	0.00443403	0.000276058	0.00165837	0.00359732	0.000276017	0.000276385	0.000828992	0.000275675	0.00525099	0.001935
Ca		0.00238111	0.00455996	0.00534722	0.0043854	0.00218069	0.00317659	0.00377124	0.00436864	0.00417461	0.00615086	0.0063642	0.0033918	0.00657636	0.00338672	0.00338101	0.00479025	0.00658888	0.00416559		0.00219104	0.00517785	0.00416597	0.00496555	0.006761	0.00495876	0.00695151	0.00556012	0.0041602	0.00297904	0.00437022
Na		0.117418	0.0757011	0.107874	0.0898199	0.0785654	0.0801185	0.0549552	0.119661	0.0712276	0.0861731	0.0723397	0.0621007	0.0710435	0.0731835	0.135683	0.108356	0.0643138	0.0793297		0.08831	0.0749594	0.114877	0.118971	0.108314	0.105887	0.0956047	0.115709	0.107548	0.103865	0.0999337
K		3.82927	3.86995	3.86224	3.8905	3.88217	3.89854	3.87698	3.8631	3.89571	3.877	3.90151	3.93276	3.8852	3.89058	3.84637	3.90765	3.95631	3.90123		3.89111	3.92548	3.88411	3.9125	3.89977	3.89605	3.90621	3.83593	3.84901	3.87571	3.89359
Ba		0.000653164	0.000870152	0.000434607	0.000583254	0.000217522	0.00188797	0.00137932	0.00384929	0.000727072	0.000290278	0.000145481	0.00102162	7.28875e-05	0.000145728	0.000145482	0.000219003	0.00116842	0.000362751		7.28515e-05	0.000946892	0.000725568	0.000871745	0.00029092	0.00101564	0.00145285	0.000581028	0.000217369	0.000217915	0.00181636
Total		19.9846	19.9809	19.9984	20.0207	19.9875	20.0093	19.9742	20.0098	20.0177	19.9908	20.0102	20.042	20.0009	19.9952	20.0128	20.036	20.0394	20.0223		20.0036	20.0559	20.0242	20.0506	20.0544	20.0242	20.0258	19.993	19.9854	20.0215	20.0324
An		0.0602957	0.115436	0.134506	0.110056	0.0550273	0.0797771	0.0958211	0.109568	0.105124	0.15496	0.159896	0.084832	0.165951	0.0853691	0.0848342	0.119137	0.163609	0.104539		0.0550289	0.129265	0.104067	0.123018	0.1684	0.123755	0.173408	0.140506	0.105037	0.0748023	0.109313
Ab		2.9733	1.91638	2.7135	2.25411	1.98251	2.0121	1.39632	3.00119	1.79364	2.17097	1.81748	1.55319	1.79275	1.84474	3.40447	2.6949	1.59698	1.99084		2.21795	1.87136	2.86966	2.94743	2.69784	2.64261	2.38489	2.92402	2.71537	2.608	2.49966
Or		96.9664	97.9682	97.152	97.6358	97.9625	97.9081	98.5079	96.8892	98.1012	97.6741	98.0226	98.362	98.0413	98.0699	96.5107	97.186	98.2394	97.9046		97.727	97.9994	97.0263	96.9296	97.1338	97.2336	97.4417	96.9355	97.1796	97.3172	97.391

## Sheet: Table 2
Table 2. Representative electron microprobe analyses of plagioclase in Mount El-Sibai granitic varities (Cations were calculated based on 32 oxygen).
Rock type		Alkali-feldspar granites													Alkali-amphibole bearing granites
Spot No.		1	2	3	4	5	6	7	8	9	10	11	12		13	14	15	16	17	18	19	20	21
SiO2		68.079	68.612	68.369	68.043	68.121	68.384	68.01	68.216	68.159	68.229	68.355	68.062		67.942	68.112	68.041	67.926	68.06	67.737	67.909	68.174	67.894
TiO2		0.002	0.02	0.009	0.004	0.002	0.007	0.002	0.02	0.009	0.008	0.006	0.01		0.032	0.021	0.002	0.007	0.014	0.012	0.002	0.013	0.016
Al2O3		19.404	19.496	19.199	19.375	19.569	19.128	19.105	19.234	19.118	19.341	19.317	19.077		19.208	19.591	19.576	19.268	19.325	19.489	19.246	19.362	19.362
FeO		0.485	0.117	0.632	0.537	0.431	0.581	1.036	0.464	0.743	0.382	0.436	0.636		0.745	0.261	0.207	0.649	0.702	0.697	0.659	0.429	0.641
MgO		0.003	0.017	0	0.007	0.001	0.004	0.008	0.007	0.01	0.014	0.009	0.002		0.007	0.021	0.011	0.012	0.015	0.006	0.022	0.005	0.012
CaO		0.004	0.002	0.009	0.01	0.003	0.001	0.013	0.007	0.012	0.008	0.013	0.072		0.014	0.015	0	0.023	0.002	0.004	0.018	0.003	0.012
Na2O		11.935	11.646	11.576	11.863	11.741	11.748	11.697	11.922	11.825	12	11.772	11.865		12.01	11.843	11.897	12.055	11.769	11.944	11.908	11.917	11.916
K2O		0.079	0.094	0.076	0.084	0.094	0.063	0.116	0.049	0.077	0.051	0.05	0.052		0.068	0.112	0.131	0.054	0.108	0.088	0.061	0.068	0.052
Total		99.991	100.004	99.87	99.923	99.962	99.916	99.987	99.919	99.953	100.033	99.958	99.776		100.026	99.976	99.865	99.994	99.995	99.977	99.825	99.971	99.905
Si		11.9374	11.9851	11.9881	11.9396	11.9351	11.9898	11.9512	11.964	11.9651	11.9521	11.9723	11.9664		11.9314	11.9296	11.9307	11.928	11.9409	11.8984	11.9382	11.9499	11.925
Ti		0.000263765	0.00262763	0.00118693	0.00052791	0.000263552	0.000923094	0.000264339	0.00263823	0.0011883	0.00105404	0.000790407	0.00132236		0.00422663	0.00276638	0.000263766	0.000924535	0.00184742	0.00158539	0.000264444	0.00171388	0.00211367
Al		4.00975	4.01345	3.96734	4.00663	4.04057	3.95235	3.95654	3.97548	3.95516	3.99285	3.98729	3.95274		3.97525	4.04378	4.0453	3.98749	3.99572	4.03444	3.98733	3.99969	4.0078
Fe(ii)		0.0711117	0.0170896	0.0926641	0.0787926	0.0631429	0.0851796	0.152231	0.0680473	0.109065	0.0559552	0.0638553	0.0935013		0.109399	0.0382247	0.0303508	0.0952974	0.102988	0.102376	0.0968724	0.0628791	0.0941427
Mg		0.000784227	0.00442707	0	0.00183118	0.000261197	0.00104554	0.00209582	0.00183026	0.00261708	0.00365617	0.00235004	0.000524219		0.00183263	0.00548333	0.00287551	0.00314152	0.00392339	0.00157123	0.00576579	0.0013066	0.00314219
Ca		0.000751411	0.000374278	0.00169066	0.00187988	0.000563102	0.000187836	0.0024474	0.00131526	0.00225681	0.00150136	0.00243934	0.0135616		0.00263392	0.00281458	0	0.00432696	0.000375922	0.000752742	0.00339005	0.000563364	0.00225803
Na		4.0572	3.94392	3.93512	4.03562	3.98802	3.99327	3.98494	4.05366	4.0244	4.07534	3.99729	4.04421		4.08887	4.02134	4.04429	4.10401	4.00307	4.06745	4.05843	4.04969	4.05756
K		0.0176698	0.0209449	0.0169986	0.0188017	0.0210078	0.0140898	0.026002	0.0109621	0.0172422	0.011396	0.0111709	0.0116619		0.0152325	0.0250223	0.0293007	0.0120958	0.0241701	0.0197177	0.0136789	0.0152042	0.0116503
Total		20.0949	19.988	20.0031	20.0837	20.0489	20.0368	20.0757	20.0779	20.077	20.0938	20.0375	20.0839		20.1288	20.069	20.0831	20.1353	20.073	20.1263	20.1039	20.081	20.1036
An		0.0184367	0.00943899	0.0427602	0.0463446	0.0140439	0.00468705	0.0609808	0.0323481	0.0558077	0.036724	0.0608178	0.333256		0.0641365	0.06951	0	0.105012	0.0093336	0.0184138	0.0831811	0.0138574	0.0554598
Ab		99.548	99.4623	99.5273	99.4901	99.462	99.6437	99.2911	99.698	99.5178	99.6845	99.6607	99.3802		99.5649	99.3125	99.2807	99.6014	99.3906	99.4992	99.5812	99.6122	99.6584
Or		0.433549	0.528215	0.42993	0.463517	0.523939	0.351583	0.64788	0.269609	0.426374	0.278752	0.278512	0.286573		0.370914	0.617961	0.719282	0.293557	0.600109	0.48234	0.335636	0.373986	0.286146

## Sheet: Table 3
Table 3. Representative electron microprobe analyses of biotite in Mount El-Sibai granitic varities (Cations were calculated based on 22 oxygen).
Rock type		Alkali-feldspar granites										Alkali-amphibole bearing granites
Spot No.		1	2	3	4	5	6	7	8	9		10	11	12	13	14	15	16	17	18	19	20
SiO2		38.263	37.686	37.763	38.273	38.213	38.791	37.613	38.327	37.657		38.143	38.109	38.494	38.253	38.261	38.606	38.187	38.345	38.532	38.74	38.019
TiO2		2.982	3.127	3.057	3.19	3.124	3.062	3.215	3.004	3.02		3.03	3.069	3.109	3.125	3.196	2.895	3.089	3.225	2.999	2.881	3.159
Al2O3		9.306	9.396	9.116	9.234	9.204	9.115	9.306	9.232	9.524		9.44	9.227	9.053	9.148	9.173	9.335	9.448	9.174	8.956	9.043	9.524
FeOt		34.283	34.825	34.968	33.833	34.132	33.329	34.417	34.05	34.523		34.264	34.202	34.163	34.355	33.982	34.314	34.253	34.422	34.27	34.332	34.385
MnO		0.348	0.38	0.385	0.394	0.374	0.405	0.382	0.369	0.394		0.447	0.503	0.489	0.509	0.506	0.554	0.444	0.511	0.506	0.548	0.469
MgO		0.032	0.039	0.024	0.03	0.041	0.053	0.023	0.043	0.02		0.042	0.013	0.027	0.014	0.025	0.026	0.034	0.015	0.004	0.026	0.024
BaO		0.008	0	0.017	0.006	0.017	0.011	0.001	0.002	0.011		0.014	0.009	0.002	0.008	0.013	0.001	0.005	0.004	0.03	0.001	0.008
CaO		0.026	0.09	0.091	0.017	0.031	0.972	0.007	0.012	0.017		0.048	0.015	0.003	0.01	0.034	0.011	0.02	0.017	0.007	0.005	0.003
Na2O		0.031	0.04	0.01	0.015	0.009	0.016	0.041	0.025	0.051		0.005	0.02	0.016	0.006	0.037	0.027	0.049	0.042	0.035	0.026	0.013
K2O		9.333	9.05	9.272	9.229	9.093	8.974	9.164	9.171	9.159		9.014	9.176	9.149	9.081	9.014	8.999	8.987	9.132	9.144	9.166	9.058
Total initial		94.612	94.633	94.703	94.221	94.238	94.728	94.169	94.235	94.376		94.447	94.343	94.505	94.509	94.241	94.768	94.516	94.887	94.483	94.768	94.662
Fe2O3calc		9.58546	10.0491	10.0576	9.44406	9.75193	8.17685	9.85853	9.66577	9.90102		9.86167	9.87025	9.90585	10.0448	9.88958	10.1242	9.92819	10.0118	10.1259	10.1115	9.8889
FeOcalc		25.6578	25.7826	25.9179	25.335	25.357	25.9713	25.5461	25.3525	25.6138		25.3902	25.3205	25.2495	25.3165	25.0831	25.204	25.3194	25.4132	25.1585	25.2335	25.4867
H2Ocalc		2.85649	2.80169	2.82776	2.79719	2.80762	2.42417	2.8051	2.83523	2.84326		2.81796	2.80751	2.79929	2.79895	2.75346	2.8285	2.80269	2.77486	2.80549	2.83266	2.81638
Totalcalc		98.4287	98.4414	98.5383	97.9643	98.0225	97.9713	97.9617	98.0385	98.2111		98.2529	98.1393	98.2966	98.3142	97.9852	98.6107	98.3133	98.6648	98.3029	98.6136	98.469
T. Si		3.10513	3.06738	3.07662	3.11222	3.1058	3.10206	3.07635	3.1129	3.07155		3.09381	3.1007	3.12118	3.10578	3.109	3.11627	3.09671	3.10676	3.12445	3.12981	3.08615
T.Al		0.338448	0.391515	0.368194	0.340237	0.341251	0.510014	0.37252	0.329153	0.38024		0.363962	0.348464	0.319725	0.339365	0.347269	0.330686	0.358749	0.343455	0.309053	0.304351	0.371402
T.Fe3+		0.556423	0.541105	0.555187	0.54754	0.552954	0.387925	0.551133	0.557946	0.548211		0.542227	0.550841	0.559092	0.554859	0.543729	0.553048	0.544541	0.549782	0.566493	0.565843	0.542448
sum Tet		4	4	4	4	4	4	4	4	4		4	4	4	4	4	4	4	4	4	4	4
M.Al		0.551613	0.509821	0.507128	0.544724	0.540395	0.349063	0.52453	0.554562	0.535321		0.538455	0.536342	0.545392	0.535996	0.531212	0.55739	0.544237	0.532565	0.546846	0.556696	0.539752
M.Mg		0.150113	0.141786	0.143562	0.157253	0.153798	0	0.166359	0.15642	0.158093		0.145934	0.156464	0.154095	0.152997	0.15216	0.142488	0.149092	0.147002	0.151391	0.146789	0.152712
M.Fe2+		1.74131	1.75497	1.76589	1.72288	1.72352	1.73688	1.74734	1.72202	1.7472		1.72227	1.7229	1.71212	1.71895	1.70452	1.7014	1.71709	1.72193	1.70605	1.70487	1.73016
M.Fe3+		0.0289424	0.0743942	0.0614306	0.030357	0.0434847	0.104136	0.0556353	0.0328126	0.0595114		0.0596986	0.053487	0.0453173	0.058844	0.060993	0.0619224	0.0613138	0.0606301	0.0513818	0.0488892	0.061609
M.Ti		0.196774	0.203455	0.199867	0.209209	0.205189	0.202912	0.209804	0.198929	0.198438		0.198937	0.201826	0.204031	0.204338	0.209255	0.191199	0.202229	0.209108	0.198345	0.19106	0.205179
M.Mn		0.0239202	0.0261973	0.0265677	0.0271369	0.0257465	0.0274321	0.0264634	0.0253847	0.0272203		0.0307094	0.0346645	0.0335831	0.0350032	0.0348257	0.0378769	0.0304967	0.0350676	0.0347527	0.0374993	0.0322459
sum oct		2.69267	2.71063	2.70445	2.69156	2.69213	2.42042	2.73013	2.69013	2.72578		2.696	2.70568	2.69454	2.70613	2.69297	2.69227	2.70446	2.7063	2.68877	2.6858	2.72166
Oct Vacancy		0.307329	0.289374	0.295555	0.30844	0.307872	0.579582	0.269869	0.309874	0.274219		0.303996	0.294316	0.30546	0.293868	0.307034	0.307728	0.295537	0.293701	0.311231	0.314199	0.278341
A.K		0.967974	0.954337	0.973766	0.962164	0.952091	1.03522	0.958944	0.955392	0.956894		0.94653	0.959129	0.952986	0.949518	0.947355	0.938329	0.940034	0.95139	0.952938	0.951994	0.945221
A.Na		0.00487763	0.00631239	0.00157962	0.00236492	0.00141824	0.00248077	0.00650171	0.00393683	0.00806545		0.000786313	0.00315506	0.00251532	0.000944501	0.00582925	0.00422562	0.0077042	0.00659774	0.00550259	0.00407266	0.002046
A.Ba		0.000254404	0	0.000542738	0.000191189	0.000541433	0.000344704	3.20502e-05	6.36538e-05	0.000351591		0.00044498	0.000286951	6.35463e-05	0.000254524	0.000413944	3.16311e-05	0.000158887	0.000126997	0.000953252	3.16586e-05	0.000254472
A.Ca		0.00226072	0.0078488	0.00794368	0.00148115	0.00269958	0.0832835	0.000613435	0.00104427	0.00148571		0.00417151	0.00130766	0.000260628	0.000869917	0.00296017	0.000951362	0.00173775	0.00147578	0.000608168	0.000432814	0.000260922
sum inter		0.975367	0.968498	0.983832	0.966201	0.95675	1.12133	0.966091	0.960437	0.966797		0.951933	0.963879	0.955825	0.951587	0.956558	0.943537	0.949635	0.959591	0.960002	0.956531	0.947783
Inter Vacancy		0.0246329	0.0315021	0.0161677	0.0337985	0.0432495	0	0.0339088	0.0395628	0.0332035		0.0480674	0.0361212	0.0441749	0.0484127	0.0434418	0.0564627	0.0503649	0.0404095	0.0399985	0.0434693	0.0522172
W.OH		1.54757	1.52239	1.53804	1.51852	1.52342	1.2942	1.53167	1.53733	1.54827		1.52592	1.525	1.51528	1.51711	1.4937	1.52424	1.51733	1.50093	1.51873	1.52782	1.52625
W.O2-		0.452426	0.477608	0.461959	0.481484	0.476582	0.705803	0.468333	0.462667	0.451731		0.474081	0.474995	0.484723	0.482888	0.506303	0.475758	0.482672	0.499075	0.481271	0.472183	0.473748
Fe3+/Fetot		0.251589	0.259653	0.25881	0.251174	0.257091	0.22076	0.257749	0.255433	0.258065		0.258982	0.259677	0.260911	0.263092	0.26187	0.265489	0.260813	0.261717	0.265875	0.265016	0.258783

## Sheet: Table4 
Table 4. Representative electron microprobe analyses of alkali-amphibole in alkali-amphibole bearing granites of Mount El-Sibai (Cations were calculated based on 32 oxygen).
Spot No.		1	2	3	4	5	6	7	8	9	10	11	12	13	14	15	16
SiO2		50.084	50.379	50.312	50.166	50.326	50.521	50.655	50	50.033	49.499	50.297	50.323	49.426	50.461	50.19	49.585
TiO2		0.096	0.348	0.157	0.275	0.371	0.115	0.088	0.149	0.148	0.196	0.186	0.324	0.272	0.326	0.352	0.283
Al2O3		1.275	0.992	1.628	1.201	1.056	1.293	1.125	1.454	1.442	1.619	1.147	1.02	1.14	1.064	1.086	1.258
FeOt		34.341	33.788	33.586	34.003	34.268	34.475	34.564	33.976	34.15	34.257	34.508	34.274	33.939	34.505	34.422	34.453
MnO		0.391	0.383	0.383	0.356	0.39	0.367	0.356	0.375	0.382	0.394	0.379	0.354	0.385	0.364	0.386	0.387
MgO		0.025	0.005	0.005	0.001	0.021	0.013	0.015	0.019	0.006	0.006	0.002	0.015	0.005	0.019	0.005	0.02
CaO		0.002	0.153	0.087	0.038	0.088	0.017	0.009	0.03	0.012	0.008	0.097	0.269	0.401	0.22	0.088	0.085
Na2O		7.717	7.286	7.736	7.255	7.544	7.723	7.758	7.591	7.603	7.524	7.362	7.409	7.535	7.399	7.387	7.364
K2O		1.155	1.472	1.38	1.445	1.376	1.147	0.98	1.24	1.222	1.439	1.16	1.131	1.116	1.16	1.136	1.176
Total initial		95.086	94.806	95.274	94.74	95.44	95.671	95.55	94.834	94.998	94.942	95.138	95.119	94.219	95.518	95.052	94.611
Fe2O3calc		8.25325	7.70435	7.71142	7.85602	8.00196	8.09891	8.10833	8.02344	8.11528	8.30885	8.16391	7.88553	8.03951	7.99641	8.14192	8.35908
FeOcalc		26.9145	26.8554	26.6471	26.934	27.0677	27.1874	27.2679	26.7563	26.8477	26.7805	27.1619	27.1784	26.7049	27.3096	27.0957	26.9313
H2Ocalc		1.91105	1.9083	1.91676	1.90641	1.91362	1.92048	1.9207	1.90873	1.91023	1.90353	1.91207	1.91169	1.89582	1.91638	1.9098	1.90038
Totalcalc		97.8238	97.4861	97.9633	97.4334	98.1552	98.4028	98.283	97.5465	97.7212	97.6779	97.8679	97.8206	96.9202	98.2354	97.7774	97.3488
T.Si		7.85124	7.90889	7.8635	7.88325	7.87859	7.88088	7.90084	7.84762	7.8466	7.79018	7.88043	7.88609	7.81036	7.88834	7.87301	7.81665
T.Al		0.094197	0.0247796	0.0706866	0.0540978	0.0563096	0.0596972	0.0438268	0.0958972	0.0971814	0.152131	0.0644377	0.0568261	0.140965	0.0525693	0.072065	0.13382
T.Ti		0.0113198	0.0410936	0.0184575	0.0325056	0.0436877	0.0134937	0.0103244	0.0175907	0.0174589	0.0232026	0.0219205	0.0381917	0.0323306	0.0383334	0.0415333	0.0335572
T.sum		7.95675	7.97476	7.95264	7.96985	7.97859	7.95407	7.95499	7.96111	7.96124	7.96552	7.96679	7.9811	7.98365	7.97925	7.98661	7.98402
C.Al		0.141365	0.158762	0.229198	0.168333	0.13853	0.178018	0.162977	0.173063	0.169349	0.148169	0.147363	0.131561	0.0713482	0.143463	0.12871	0.0999062
C.Ti		0	0	0	0	0	0	0	0	0	0	0	0	0	0	0	0
C.Fe3		0.973593	0.910154	0.906968	0.928991	0.942683	0.950698	0.95169	0.947637	0.957727	0.984024	0.962541	0.929906	0.956001	0.940673	0.96109	0.991613
C.Mn2		0.0584988	0.0580058	0.0597573	0.0543193	0.0587791	0.0561757	0.0545235	0.0569274	0.0574654	0.0587572	0.0558127	0.0539685	0.0580126	0.0547401	0.0564138	0.0561901
C.Mg		0.00584235	0.00117016	0.00116499	0.000234263	0.00490099	0.00302311	0.00348779	0.0044456	0.00140276	0.0014077	0.000467139	0.00350425	0.00117786	0.00442784	0.00116924	0.00470012
C.Fe2		3.48216	3.49694	3.47743	3.48472	3.50257	3.50696	3.51731	3.46847	3.47214	3.4538	3.49492	3.51644	3.48914	3.51634	3.48717	3.46313
C.sum		4.66146	4.62504	4.67452	4.6366	4.64746	4.69488	4.68998	4.65054	4.65808	4.64616	4.6611	4.63538	4.57568	4.65964	4.63455	4.61554
B.Mn2		0	0	0	0	0	0	0	0	0	0	0	0	0	0	0	0
B.Fe2		0.0462699	0.0288303	0.00553893	0.0548599	0.0411783	0.0397564	0.039491	0.0434994	0.0490357	0.0709279	0.0640526	0.0454062	0.0399392	0.0539379	0.0673494	0.0873234
B.Mg		0	0	0	0	0	0	0	0	0	0	0	0	0	0	0	0
B.Ca		0.17615	0.202421	0.183035	0.186024	0.186449	0.169356	0.168845	0.182376	0.177981	0.182283	0.189927	0.217352	0.252832	0.204677	0.19048	0.198465
B.Na		1.83215	1.82991	1.8764	1.81229	1.82653	1.83556	1.83431	1.83161	1.8264	1.80528	1.78747	1.7913	1.79176	1.78468	1.78554	1.76575
B.sum		2.05457	2.06116	2.06497	2.05317	2.05416	2.04467	2.04265	2.05749	2.05341	2.05849	2.04145	2.05406	2.08453	2.0433	2.04337	2.05154
A.Ca		0	0	0	0	0	0	0	0	0	0	0	0	0	0	0	0
A.Na		0.513346	0.387782	0.467868	0.398154	0.463302	0.500241	0.511792	0.478394	0.485434	0.490591	0.448933	0.459835	0.51682	0.457905	0.461121	0.485016
A.K		0.234273	0.293634	0.274693	0.289126	0.274991	0.231112	0.199853	0.250351	0.246892	0.288712	0.23535	0.229371	0.228853	0.234311	0.231214	0.240337
A.sum		0.747619	0.681416	0.742561	0.68728	0.738293	0.731353	0.711646	0.728745	0.732326	0.779302	0.684283	0.689206	0.745672	0.692216	0.692335	0.725352
W.OH		2	2	2	2	2	2	2	2	2	2	2	2	2	2	2	2
W.sum		2	2	2	2	2	2	2	2	2	2	2	2	2	2	2	2
calc.Fetot		4.50203	4.43593	4.38994	4.46857	4.48643	4.49742	4.50849	4.4596	4.4789	4.50875	4.52151	4.49175	4.48508	4.51095	4.5156	4.54206
calc.tot.Fe3+		0.973593	0.910154	0.906968	0.928991	0.942683	0.950698	0.95169	0.947637	0.957727	0.984024	0.962541	0.929906	0.956001	0.940673	0.96109	0.991613
calc.tot.Fe2+		3.52843	3.52577	3.48297	3.53958	3.54375	3.54672	3.5568	3.51197	3.52117	3.52473	3.55897	3.56185	3.52908	3.57028	3.55451	3.55045
calc.Fe3+/Fetot		0.216257	0.205178	0.206601	0.207894	0.210119	0.211388	0.211089	0.212494	0.213831	0.218247	0.212881	0.207025	0.213151	0.208531	0.212837	0.218318
Final Name		Arfvedsonite

## Sheet: Table 5
Representative EMP analyses of zircon and thorite from Mount El-Sibai granites (cations on the basis of 4 and 6 oxygen, respectively)
Mineral/Rock		Zircon/Alkali-feldspar granite						Zircon/Alkali-amphibole granite							Thorite/Alkali-amphibole granite
Spot No		1	2	3	4	5		6	7	8	9	10	11		12	13	14	15
SiO2		32.4224	32.5656	32.6785	32.6681	32.1249		32.1332	32.7092	32.3598	32.7427	32.4572	32.5624		18.2563	17.3736	16.0477	16.1892
ZrO2		65.0205	64.9365	64.435	64.4418	65.4653		65.4455	62.878	62.796	62.0466	61.097	64.9242		0.9635	1.0144	1.1082	1.1925
HfO2		1.6016	1.635	1.69794	1.647	1.8171		1.7627	3.14504	3.012	4.0262	4.8764	1.68505		0.0063	0.0084	0.0798	0.0458
ThO2		0.0403	0.051	0.0249485	0.0242	0.011958		0.0116	0.142279	0.153143	0.1382	0.149	0.0525611		61.3841	61.7515	69.4817	69.7102
UO2		0.0918	0.0981	0.0329898	0.032	0.0724696		0.0703	0.0582706	0.0830469	0.0566	0.0808	0.101103		9.2365	8.8527	2.4502	2.894
Y2O3		0.4918	0.3821	0.560105	0.5433	0.162567		0.1577	0.213213	0.247496	0.2071	0.2408	0.393796		4.3798	5.1379	3.3131	3.2869
P2O5		0.0983	0.0854	0.0596909	0.0579	0.0605116		0.0587	0.0751547	0.0889054	0.073	0.0865	0.0880141		0.1025	0.1187	1.0883	0.8937
FeO		0.1114	0.121	0.391651	0.3799	0.188029		0.1824	0.677319	1.16317	0.6579	1.1317	0.124704		1.458	1.6241	3.0549	2.5681
TiO2		0.0032	0.002	0.041031	0.0398	0.0178339		0.0173	0.00772137	0.0058585	0.0075	0.0057	0.00206122		0.0237	0.0153	0.0149	0.0136
Cr2O3		0.0076	0.009	0.0131959	0.0128	0.00762838		0.0074	0.0176047	0.0120254	0.0171	0.0117	0.00927549		0.0058	0.0089	0.0696	0.0593
Al2O3		0.0155	0.01725	0.0170104	0.0165	0.0116487		0.0113	0.034077	0.0385428	0.0331	0.0375	0.017778		0.3251	0.4047	0.0651	0.0726
CaO		0.001	0.001	0.01412	0.0137	0.0301012		0.0292	0.00555939	0.00596128	0.0054	0.0058	0.00103061		1.4213	1.4849	0.8079	0.9865
La2O3		0.0091	0.008	0.00402063	0.0039	0.000206173		0.0002	0.00689776	0.00441957	0.0067	0.0043	0.00824488		0.0783	0.0933	0.0136	0.0178
Ce2O3		0.0076	0.009	0.0131959	0.0128	0.00762838		0.0074	0.0176047	0.0120254	0.0171	0.0117	0.00927549		0.0058	0.0089	0.0696	0.0593
Total		99.9221	99.921	99.9834	99.8937	99.9779		99.8949	99.9879	99.9823	100.035	100.196	99.9796		97.647	97.8973	97.6646	97.9895
Si		0.997858	1.00128	1.0038	1.00406	0.990966		0.991605	1.00933	1.0015	1.01249	1.00794	1.00094		1.42963	1.37359	1.29127	1.30276
Zr		0.975692	0.973477	0.965044	0.965703	0.984616		0.984699	0.946022	0.947576	0.935477	0.925089	0.973054		0.0367875	0.0391035	0.0434773	0.0467881
Hf		0.0140695	0.0143488	0.0148871	0.0144488	0.0159992		0.0155262	0.0277007	0.0266072	0.0355363	0.043224	0.0147844		0.000140816	0.00018956	0.00183278	0.00105197
Th		0.000282226	0.00035681	0.000174382	0.000169247	8.39353e-05		8.14539e-05	0.000999019	0.00107848	0.000972418	0.00105288	0.000367642		1.09379	1.11092	1.27217	1.27645
U		0.00062862	0.000671102	0.000225469	0.000218831	0.000497387		0.000482683	0.000400069	0.000571858	0.000389416	0.000558287	0.000691475		0.160931	0.155727	0.0438661	0.0518153
Y		0.00805432	0.00625161	0.0091553	0.00888574	0.00266849		0.0025896	0.00350101	0.00407595	0.00340779	0.00397922	0.00644139		0.182508	0.216157	0.141859	0.140748
P		0.00256204	0.00222364	0.00155275	0.00150704	0.00158075		0.00153402	0.00196394	0.00233013	0.00191164	0.00227483	0.00229114		0.00679739	0.00794743	0.0741588	0.0609029
Fe		0.0028669	0.0031109	0.0100598	0.00976358	0.00485004		0.00470666	0.0174767	0.0301016	0.0170114	0.0293873	0.00320534		0.0954709	0.10737	0.205544	0.172804
Ti		7.4074e-05	4.62508e-05	0.000947962	0.000920051	0.000413767		0.000401534	0.000179205	0.000136371	0.000174433	0.000133135	4.76549e-05		0.00139589	0.00090981	0.000901745	0.000823131
Cr		0.000184919	0.000218769	0.000320458	0.000311022	0.000186035		0.000180535	0.000429475	0.00029423	0.000418039	0.000287247	0.00022541		0.000359073	0.000556292	0.00442751	0.00377258
Al		0.000562193	0.000625053	0.000615786	0.000597655	0.000423473		0.000410954	0.00123924	0.00140578	0.00120624	0.00137242	0.000644028		0.0300025	0.0377078	0.00617329	0.00688502
Ca		3.2972e-05	3.29397e-05	0.000464668	0.000451107	0.000994769		0.000965361	0.000183786	0.000197654	0.000178892	0.000192963	3.39397e-05		0.119239	0.125773	0.0696442	0.0850467
La		0.000103291	9.07159e-05	4.55487e-05	4.42076e-05	2.34554e-06		2.2762e-06	7.84995e-05	5.04452e-05	7.64093e-05	4.9248e-05	9.34698e-05		0.00226135	0.00272048	0.00040359	0.000528267
Ce		8.5626e-05	0.0001013	0.000148387	0.000144017	8.61426e-05		8.35959e-05	0.000198866	0.000136242	0.000193571	0.000133008	0.000104375		0.000166267	0.000257588	0.00205014	0.00174687
Total		2.00306	2.00284	2.00745	2.00723	2.00337		2.00327	2.0097	2.01606	2.00944	2.01568	2.00292		3.15948	3.17893	3.15778	3.15212
ThO2/UO2		0.438998	0.519878	0.75625	0.75625	0.165007		0.165007	2.4417	1.84406	2.4417	1.84406	0.519878		6.64582	6.97544	28.3576	24.0878
Zr/Hf		69.348	67.8436	64.8241	66.8362	61.5418		63.4219	34.1516	35.6135	26.3245	21.4022	65.8161		261.246	206.285	23.7221	44.4765

## Sheet: Table 6
Representative EMP elemental (%) analyses of fluorite from Mount El-Sibai alkali-amphibole granites (cations on the basis of 4 and 6 oxygen, respectively)
Spot No.		1	2	3	4	5	6	7
Na		0.17	0.193333	0.103333	0.0766667	0.11	0.153333	0.123333
Si		0.0133333	0.00733333	0.005	0.00766667	0.01	0.01	0.01
Mg		0.0633333	0.09	0.08	0.0733333	0.07	0.0566667	0.08
Ca		51.96	52.4733	52.1033	51.6533	52.14	52.6633	51.98
Ti		0.00733333	0.007	0.0133333	0.0166667	0.0166667	0.0133333	0.0133333
Mn		0.02	0.0133333	0.0133333	0.0166667	0.0133333	0.01	0.0166667
Fe		0.146667	0.183333	0.103333	0.0766667	0.133333	0.163333	0.105667
P		0.00166667	0.00233333	0.002	0.00166667	0.00266667	0.004	0.00333333
F		47.87	47.3133	47.7233	47.9067	47.14	46.3767	47.02
Total		100.252	100.283	100.147	99.8293	99.636	99.4507	99.3523

## Sheet: Table 7
Representative EMP analyses of nioboaeschynite-(Ce) from from Mount El-Sibai alkali-amphibole granites (Cations on the basis of 6 Oxygen)
Spot No.		1	2	3	4
TiO2		3.9623	4.996	4.8729	4.3618
Al2O3		0.0005	0.0007	0.0012	0.0009
Nb2O5		64.8719	61.4904	60.2645	63.2845
FeO		2.0119	0.123	0.5929	0.1436
MnO		0.0678	0.0367	0.021	0.022
CaO		3.3361	4.0898	4.3808	3.0322
SiO2		0.0082	0.0097	0.0056	0.0073
Ta2O5		3.3059	3.2921	3.3715	3.3836
Y2O3		0.4941	0.0888	0.1323	0.121
La2O3		2.1425	3.2457	2.4586	3.1654
Ce2O3		17.2596	21.2158	22.147	19.3545
Yb2O3		0.1036	0.0128	0.0146	0.0146
ZrO2		0.0568	0.1425	0.0148	0.3543
Total		97.6212	98.744	98.2777	97.2457
Ti		0.182459	0.231391	0.227659	0.203815
Al		3.60767e-05	5.07997e-05	8.7845e-05	6.58949e-05
Nb		1.79544	1.71171	1.69222	1.77676
Fe		0.103	0.00633346	0.0307957	0.00745997
Mn		0.0027424	0.00149305	0.000861787	0.000861933
Ca		0.21882	0.269809	0.291528	0.201818
Si		0.000502042	0.000597317	0.000347851	0.000453526
Ta		0.0550376	0.0551251	0.0569471	0.0579568
Y		0.0160975	0.0029098	0.00437303	0.0040002
La		0.0483774	0.0737118	0.0563234	0.0725276
Ce		0.386835	0.478257	0.503604	0.440179
Yb		0.00193403	0.000240337	0.000276526	0.000276573
Zr		0.00169556	0.00427845	0.000448235	0.0107322
Total		2.81298	2.8359	2.86547	2.7769

## Sheet: Table 8
Representative EMP analyses of columbites from from Mount El-Sibai alkali-amphibole granites (Cations on the basis of 6 Oxygen)
Spot No.		1	2	3	4	5	6	7	8	9	10	11	12	13	14	15	16	17	18
CaO		0.0026	0.00247063	0.0096	0.00912268	0.0017	0.00162315	0.0029	0.00276813	0.025	0.0236941	0.0083	0.00790037	0.0801	0.0754843	0.017	0.016213	0.0058	0.00546767
FeO		18.3103	17.9992	16.6146	16.7885	18.3383	18.5093	18.3627	17.5277	17.7603	17.8325	18.3322	18.4495	18.5636	17.4939	17.6254	17.8094	17.5355	17.5307
MnO		3.1088	2.95412	3.9597	3.76282	2.4833	2.37104	2.4164	2.30652	3.5461	3.36086	2.8594	2.72173	2.8934	2.72667	3.8601	3.68139	3.7453	3.5307
TiO2		1.6023	1.52257	1.1445	1.08759	2.8089	2.68192	3.3344	3.18278	1.8367	1.74076	1.5735	1.49774	1.305	1.2298	1.0123	0.965435	1.4499	1.36682
Nb2O5		75.5368	75.9783	76.5117	76.5075	73.1329	73.6267	72.938	74.3213	75.3856	75.6215	76.5921	76.7044	76.5345	77.8667	76.0163	75.9971	75.9203	76.3129
Ta2O5		1.091	1.03672	1.4096	1.33951	2.1889	2.08994	1.8833	1.79766	0.7815	0.740676	0.1025	0.0975649	0.1378	0.129859	0.7571	0.722049	0.7769	0.732385
SnO2		0.0135	0.0128283	0.009	0.00855251	0.058	0.0553779	0.1098	0.104807	0.0404	0.0382896	0.0335	0.0318871	0.0081	0.00763325	0.0283	0.0269898	0.029	0.0273383
WO3		0.1562	0.148428	0.138	0.131139	0.3529	0.336946	0.3353	0.320053	0.1952	0.185003	0.1476	0.140493	0.1237	0.116572	0.1099	0.104812	0.1605	0.151304
Y2O3		0.1397	0.132749	0.1405	0.133514	0.1307	0.124791	0.1218	0.116261	0.1377	0.130507	0.1401	0.133355	0.1358	0.127975	0.1498	0.142865	0.1294	0.121986
Ca		0.000156638	0.000148929	0.000578758	0.000550864	0.000102908	9.79513e-05	0.000175028	0.000166337	0.00150699	0.0014285	0.000498691	0.000474771	0.00482043	0.00452848	0.00102917	0.000982674	0.000349805	0.000329487
Fe		0.860993	0.846849	0.781802	0.791253	0.866444	0.871812	0.865022	0.822071	0.835606	0.839141	0.859704	0.865373	0.871961	0.81915	0.832836	0.842516	0.825464	0.824551
Mn		0.148058	0.140772	0.188714	0.179619	0.118835	0.113112	0.115291	0.109566	0.168981	0.16018	0.135814	0.1293	0.137651	0.129314	0.184737	0.176391	0.178567	0.168195
Ti		0.0677529	0.0644185	0.0484287	0.0460946	0.119343	0.113595	0.14125	0.134237	0.0777087	0.0736613	0.0663561	0.0631734	0.055122	0.0517835	0.043014	0.0410706	0.0613759	0.0578109
Nb		1.92014	1.93246	1.94627	1.94929	1.86794	1.87473	1.85743	1.88437	1.91738	1.9237	1.94172	1.94494	1.94339	1.97105	1.94176	1.94354	1.932	1.94037
Ta		0.0166825	0.0158615	0.0215693	0.0205297	0.033631	0.0320111	0.0288498	0.0274173	0.0119567	0.011334	0.00156312	0.00148814	0.00210483	0.00197735	0.0116334	0.0111078	0.0118926	0.0112018
Sn		6.99956e-05	6.65507e-05	4.66962e-05	4.44457e-05	0.000302163	0.000287609	0.000570329	0.00054201	0.000209587	0.000198671	0.000173225	0.000164917	4.19519e-05	3.94111e-05	0.000147448	0.000140786	0.000150526	0.000141782
W		0.00227618	0.00216416	0.00201237	0.00191538	0.00516719	0.00491831	0.00489492	0.00465188	0.00284612	0.00269788	0.00214507	0.00204219	0.00180064	0.00169158	0.00160931	0.0015366	0.0023414	0.0022054
Y		0.00418033	0.0039746	0.0042072	0.00400443	0.00392977	0.00374049	0.0036513	0.00347001	0.00412283	0.0039081	0.00418102	0.00398048	0.00405924	0.00381339	0.00450446	0.00430094	0.00387636	0.0036512
Total		3.02031	3.00672	2.99363	2.9933	3.0157	3.0143	3.01714	2.9865	3.02032	3.01625	3.01216	3.01094	3.02096	2.98335	3.02127	3.02159	3.01602	3.00846
Mn/(Mn+Fe)		0.14673	0.142536	0.194447	0.185008	0.120611	0.114843	0.117606	0.117606	0.168209	0.160289	0.136426	0.129992	0.13634	0.13634	0.181547	0.173118	0.17785	0.169424
Ta/(Ta+Nb)		0.00861337	0.0081411	0.0109609	0.0104221	0.0176859	0.0167884	0.0152945	0.0143412	0.00619733	0.00585727	0.000804367	0.000764548	0.0010819	0.00100219	0.00595547	0.00568275	0.00611795	0.00573991
